1 Original Article

2 **Internet Use impact on Physical Health during COVID-19 pandemic in Bangladesh: A**  
3 **Web-based Cross-sectional study**

4  
5 **Authors:** Tanvir Abir<sup>1</sup>, Uchechukwu Levi Osuagwu<sup>2</sup>, Dewan Muhammad Nur–A Yazdani<sup>3</sup>,  
6 Abdullah Al Mamun<sup>4</sup>, Kaniz Kakon<sup>5</sup>, Anas A. Salamah<sup>6</sup>, Noor Raihani Zainol<sup>7</sup>, Mansura  
7 Khanam<sup>8</sup>, Kingsley Emwinyore Agho<sup>9</sup>

8 **Affiliation:**

9 <sup>1</sup>. Associate Professor, College of Business Administration—CBA, International University  
10 of Business, Agriculture and Technology—IUBAT University, Dhaka 1230, Bangladesh;  
11 [tanvir.cba@iubat.edu](mailto:tanvir.cba@iubat.edu);

12 <sup>2</sup>. Diabetes, Obesity and Metabolism Translational Research Unit, Western Sydney  
13 University, Campbelltown, NSW 2560, Australia; African Vision Research Institute (AVRI),  
14 University of KwaZulu-Natal, Westville Campus, Durban, 3629, South Africa;  
15 [losuagwu@westernsydney.edu.au](mailto:losuagwu@westernsydney.edu.au);

16 <sup>3</sup>. Assistant Professor, College of Business Administration—CBA, International University of  
17 Business, Agriculture and Technology—IUBAT University, Dhaka 1230, Bangladesh;  
18 [dewanm@iubat.edu](mailto:dewanm@iubat.edu)

19 <sup>4</sup>. Faculty of Business and Management, UCSI University, Kuala Lumpur 56000, Malaysia;  
20 [abdullaham@ucsiuniversity.edu.my](mailto:abdullaham@ucsiuniversity.edu.my);

21  
22 <sup>5</sup>. Assistant Professor, Department of Philosophy, College of Arts and Sciences—CAAS,  
23 International University of Business, Agriculture and Technology—IUBAT University,  
24 Dhaka 1230, Bangladesh; [kanizkakon@iubat.edu](mailto:kanizkakon@iubat.edu)

25 <sup>6</sup>. Department of Management Information Systems, College of Business Administration,  
26 Prince Sattam Bin Aziz University, 165 Al-Kharj 11942, Saudi Arabia. Email:  
27 [a.salameh@psua.edu.sa](mailto:a.salameh@psua.edu.sa)

28 <sup>7</sup>. Lecturer, Faculty of Entrepreneurship and Business, Universiti Malaysia Kelantan, 16100  
29 Kota Bharu, Malaysia; [raihani@umk.edu.my](mailto:raihani@umk.edu.my)

30 <sup>8</sup>. Maternal and Child Nutrition, Nutrition and Clinical Services Division, icddr,b  
31 Bangladesh; [mansura@icddr.org](mailto:mansura@icddr.org)

32 <sup>9</sup>. Associate Professor, School of Health Science, Western Sydney University, Campbelltown,  
33 NSW 2560, Australia; African Vision Research Institute (AVRI), University of KwaZulu-  
34 Natal, Westville Campus, Durban, 3629, South Africa; [K.Agho@westernsydney.edu.au](mailto:K.Agho@westernsydney.edu.au)

35 \* Correspondence: Tanvir Abir (PhD), Associate Professor, College of Business  
36 Administration—CBA, International University of Business, Agriculture and Technology—  
37 IUBAT University, Dhaka 1230, Bangladesh; [tanvir.cba@iubat.edu](mailto:tanvir.cba@iubat.edu)

NOTE: This preprint reports new research that has not been certified by peer review and should not be used to guide clinical practice.

39 **Funding:** This research did not receive any funding.

40

41 **Declaration of Conflict of Interest:** The authors declare that they have no known competing  
42 financial interests or personal relationships that could have appeared to influence the work  
43 reported in this paper.

44

45 **Author Contribution:** Conceptualization, T.A. and D.M.N.-A. Y; Data curation, T.A. and  
46 K.A; Formal analysis, U.L.O. and K.A; Investigation, D.M.N.-A.Y. and M.K.; Methodology,  
47 T.A., A.A.M, A.A.S.; Project administration, K.A., D.M.N.-A.Y., K.K.; Resources, D.M.N.-  
48 A.Y., A.A.M. and N.R.Z; Supervision, N.R.Z. and K.A.; Validation, T.A. and K.A.;  
49 Visualization, M.K. and K.A.; Writing—original draft, T.A. and U.L.O.

50 All authors have read and agreed to the published version of the manuscript.

51

52 **Article Type:** Original Research.

53 **Keywords:** Internet use, Coronavirus, Survey, Headache, Back pain, Neck pain, Physical  
54 health

55 **Running Head:** Internet use and Physical health of Bangladeshi Adults

56

57 **Ethics Statement:** Permission for this study (IUBAT/AR/2021/001) was obtained from the  
58 Institutional Review Board of International University of Business, Agriculture and  
59 Technology (IUBAT), Dhaka, Bangladesh. The study adhered to the tenets of the Declaration  
60 of Helsinki as revised in Fortaleza. All the participants were informed about the specific  
61 objective of this study before proceeding to the questionnaire. Consent was obtained from all  
62 participants prior to completing the questionnaire through an online preamble. Participants  
63 were able to complete the survey only once and could terminate the survey at any time they  
64 desired. Anonymity and confidentiality of the data were ensured.

65 **Data Reference:** Our data are included in the manuscript and raw data can be released at  
66 reasonable request.

67

68 **Abstract**

69 **Background:** Bangladesh ranked fifth largest internet user in Asia. Past studies on internet  
70 use have focused on its impact on mental health, with little known about its impact on the  
71 physical health of individuals during COVID-19 pandemic. Hence, this study examines the  
72 impact of Internet use frequency on physical health during the Covid-19 lockdown in  
73 Bangladesh.

74 **Methods:** A web-based cross-sectional study on 3242 individuals aged 18 and above was  
75 conducted from 2<sup>nd</sup> August – 1<sup>st</sup> October 1, 2020, during the lockdown in Bangladesh. The  
76 survey covers demographics, Internet use frequency and physical health questions. Multiple  
77 linear regression analyses were used to examine the impact of internet use frequency on  
78 physical health.

79 **Results:** The result indicated that 72.5%, 69.9%, 65.1% and 55.3% reported headache, back  
80 pain, numbness of the fingers and neck pain, respectively. The multivariable analyses showed  
81 increased physical health impact among regular (coefficient  $\beta = 0.52$ , 95% confidence interval  
82 [CI]: 0.18-0.85,  $P = 0.003$ ), frequent ( $\beta = 1.21$ , 95%CI: 0.88–1.54,  $P < .001$ ) and intense ( $\beta$   
83 = 2.24, 95%CI: 1.91–2.57,  $P < .001$ ) internet users. Other factors associated with physical  
84 health scores were gender, income (in Taka), occupation, regions, and working status.

85 **Conclusion:** Frequent, intensive, and extensive use of the internet were strong predictors of  
86 increased physical health problems, and the study suggests the need for raising awareness of  
87 physical health problems triggered by high internet users among the high socioeconomic  
88 group in Bangladesh.

89

90

## 91 INTRODUCTION

92 The coronavirus disease 2019 (COVID-19) pandemic and the associated public health  
93 interventions, including social distancing, home quarantine measures, and ‘stay-at-home’  
94 orders, put in place by the various governments, led to a surge in internet usage during the  
95 pandemic <sup>[1]</sup>. The lockdown measures resulted in widespread and unprecedented social  
96 disruption <sup>[2]</sup> as non-essential businesses were closed or some employees worked from home  
97 and unemployment increased <sup>[3]</sup>. There were massive changes in internet usage patterns and  
98 user behaviour with employees having to adjust to the new "normals" - with meetings going  
99 completely online, office work shifting to the home, leading to new emerging patterns of  
100 work. These changes have come across most organizations, businesses, societies, or  
101 governments and suddenly, leaving barely any time for organizations and people to plan for,  
102 prepare and implement new setups and arrangements. Society has had to adjust, try,  
103 experiment, and find ways that did not exist before the pandemic <sup>[1]</sup>, and these may have  
104 implications on the physical health of individuals.

105 People are now spending even more time with technology while consuming news  
106 media, watching television, using social media to connect with others, utilizing lifestyle apps  
107 to shop for groceries and other consumer goods, and engaging in home workouts <sup>[2]</sup>. In  
108 Bangladesh, this kept parts of the economy going <sup>[4]</sup> as the country witnessed a boom in  
109 internet usage due to the fast-growing mobile internet and the government's push for  
110 digitalization. Engaging in social media platforms is now a routine activity for children and  
111 adults, enhancing communication, social connection, and even technical skills <sup>[5]</sup>. Platforms  
112 such as Facebook and Twitter offer multiple daily opportunities for connecting with friends,  
113 classmates, and people with shared interests. The number of people using such sites has also  
114 increased dramatically over the last five years, as shown in a recent poll <sup>[6]</sup>. A past study  
115 reported that about 22% of teenagers log on to their favorite social media site more than ten  
116 times a day, and more than half of adolescents log on to a social media site more than once a

117 day <sup>[6,7]</sup>. Seventy-five percent of teenagers now own cell phones, 25% use them for social  
118 media, 54% use them for texting, and 24% use them for instant messaging <sup>[7]</sup>.

119 According to the Bangladesh Telecommunication Regulatory Commission, there were  
120 99,428 million (approx. 60.9% of the population) internet users in February 2020 <sup>[8]</sup>. Though  
121 there is anecdotal early evidence that this may lead to increased productivity, it has also led to  
122 increased stress <sup>[9,10]</sup> where employees must learn new technologies, be available for work at  
123 almost all times, stay with digital devices all the time, and cope with multi-tasking <sup>[1]</sup>. The  
124 use of video-conferencing and content delivery services such as Zoom and Akamai also  
125 increased <sup>[1]</sup>. Those working from home using this technology have found themselves under  
126 intense scrutiny and tension <sup>[11]</sup>.

127 That a large part of the peoples' social and emotional development is occurring while  
128 on the Internet and cell phones may affect the physical health of individuals considering the  
129 long hours spent on the internet during the mandatory stay at home orders which expose the  
130 population to lots of misinformation <sup>[12]</sup> known to affect physical and mental health <sup>[13]</sup>. Since  
131 this high use of information systems may become the new normal, this study examined the  
132 impact of internet usage frequency during the COVID-19 pandemic on Bangladeshi residents'  
133 physical and mental health and determined the level of addiction to social media platforms  
134 used by the people.

### 135 **Ethical consideration**

136 Permission for this study (IUBAT/AR/2021/001) was obtained from the Institutional Review  
137 Board of International University of Business, Agriculture and Technology (IUBAT), Dhaka,  
138 Bangladesh. The study adhered to the tenets of the Declaration of Helsinki as revised in  
139 Fortaleza. All the participants were informed about the specific objective of this study before  
140 and consent was obtained from all participants before completing the questionnaire through  
141 an online preamble. To avoid repeated responses and in order to ensure the validity of data to

142 some extent, participants were able to complete the survey only once as data was restricted to  
143 their IP addresses and device. Participants could terminate the survey at any time they  
144 desired. Anonymity and confidentiality of the data were ensured.

## 145 **METHODS**

### 146 **Study population and sampling**

147 By convenience sampling, 3242 questionnaires were collected from adults aged 18 and over  
148 living in eight divisions across Bangladesh during the pandemic. All questionnaires were  
149 web-based, participation was voluntary, and each participant was informed about the study's  
150 background through an online preamble. No reward or incentive was offered for  
151 participation. There may be more than one questionnaire filled by the same person that  
152 affects the statistical analysis results of questionnaire data. In order to ensure the validity of  
153 data to some extent, restricting the same IP address and device are applied to the system,  
154 which means the participant of the same IP address or device only can fill once.

### 155 **Data Collection**

156 Data were collected using self-administered web-based questionnaires distributed to various  
157 groups of people via the E-link using numerous mailing lists and social network sites  
158 including Facebook, WhatsApp and Twitter. Due to the mandatory lockdown, no paper  
159 questionnaires were distributed, making it difficult to reach the very remote regions.

### 160 **Dependent variable**

161 Ten items of physical complaints reported in *Table 2* below were used to determine the  
162 impact of individual physical health on Internet use. The respondents used a close-end  
163 response ['Yes' or 'No'] to indicate whether they suffered from the following ten problems  
164 (Back and neck pain, numbness in fingers, headaches, inability to sleep, dry eyes or other  
165 vision problems, poor nutrition, poor personal hygiene, weight gain/loss and loss of appetite]  
166 during or after pro-longed Internet use. Binary scores for individual questions were summed

167 to give a physical health score which ranged from 0-10, and the Kuder Richardson coefficient  
168 measuring internal consistency among the physical health scores ranged from 0.65 to 0.78,  
169 indicating a satisfactory level of reliability.

170

### 171 **Main study factor**

172 The main study variable was the respondent's Internet usage, including the average daily  
173 amount of time spent on the internet and dependence on networks. The frequency of internet  
174 use was categorized as 'seldom' (<1 hour per day), 'casual' ( $\geq 1$  and <3 hours per day),  
175 'regular' ( $\geq 3$  and <5 hours per day), 'frequent' ( $\geq 5$  and <7 hours per day), 'intense' ( $\geq 7$  hours  
176 per day) [14].

177

### 178 **Independent variables**

179 Independent variables used for the study analyses were based on previous studies [14-16].  
180 Independent variables included demographic characteristics (i.e., gender, age [categorized as  
181 18-27, 28-37, 38 years and over], marital status [single, married, divorced/widowed], mothers  
182 level of education [Higher education, Bachelor, Intermediate], place of residence,  
183 employment status [Employed, unemployed/student], occupation [healthcare and non-  
184 healthcare worker], and income in Taka [lower, middle and high-income earners].

185

### 186 **Statistical Analysis**

187 All statistical analyses were performed in Stata version 14.1 (Stata Corp. 2015, College  
188 Station USA) mainly using descriptive statistics; t-test used compares the means of two  
189 independent groups, One-way analysis of variance (one-way ANOVA) used compares the  
190 means of more than two independent groups, correlation analyses, and regression analysis.  
191 All confounding variables with a  $P < .20$  were retained in the univariate linear regression  
192 analysis and were used to build a multivariable model [17]. A manual elimination procedure

193 was applied for multivariate linear regression analyses to remove non-significant variables ( $P$   
194  $> .05$ ). The main study factor variable (Internet usage frequency) was added to all significant  
195 confounding variables after elimination processes. The main study factor and independent  
196 variables associated with physical health scores ( $P < .05$ ) were reported. In the regression  
197 analysis, we checked for homogeneity of variance and multicollinearity, including Variance  
198 Inflation Factors (VIF) and the  $VIF < 4$  was considered suitable [18].

199

## 200 RESULTS

### 201 Demographic Characteristics According to the Frequency of Internet Use among adults 202 in Bangladesh

203 *Table 1* depicts the main demographic characteristics, including gender, education and age  
204 group on the five groups extracted. It is worth noting that the education in this paper refers to  
205 that of the mothers' maximum educational level. The majority of participants were males  
206 (1260, 61.1%), married (2632, 81.2%) and employed (2864, 88.3%) in non-healthcare sectors  
207 (2567, 79.2%), and for many, their mothers had completed a bachelor degree or higher.  
208 About half of the respondents earned more than 70,000 Taka at the time of data collection  
209 (*Table 1*).

210 About two-thirds of the respondents that reported intense use of the internet were  
211 males, while females were more likely to report regular and casual use of the internet. More  
212 than half of intense and frequent internet users were aged 28-37years, and a similar  
213 proportion of casual internet users were younger (18-27years). Nearly all intense internet  
214 users were employed and working in the non-Health care sector during the study.

215 *Table 1* Demographic Characteristics According to the Frequency of Internet Use among  
216 adults in Bangladesh. Values are expressed as numbers and percentages (n, %).

| Variables  | Total<br>(N=3236) | Intense<br>(n=1668) | Frequent<br>(n=689) | Regular<br>(n=559) | Casual<br>(n=187) | Seldom<br>(n=93) |
|------------|-------------------|---------------------|---------------------|--------------------|-------------------|------------------|
| Demography |                   |                     |                     |                    |                   |                  |



|                                    |             |              |            |             |            |           |
|------------------------------------|-------------|--------------|------------|-------------|------------|-----------|
| <i>Gender</i>                      |             |              |            |             |            |           |
| Male                               | 1976 (61.1) | 1179 (70.7)  | 382 (55.4) | 264 (44.1)  | 93 (44.7)  | 58 (62.4) |
| Female                             | 1260 (38.9) | 489 (29.3)   | 307 (44.6) | 335 (55.9)  | 94 (50.3)  | 35 (37.6) |
| <i>Age in years</i>                |             |              |            |             |            |           |
| 18-27                              | 555 (17.2)  | 30 (1.8)     | 156 (22.6) | 254 (42.1)  | 98 (52.4)  | 17 (17.9) |
| 28-37                              | 1657 (51.1) | 956 (57.3)   | 366 (53.1) | 238 (39.5)  | 60 (32.1)  | 37 (39.0) |
| 38+                                | 1030 (31.8) | 682 (40.9)   | 167(24.2)  | 111 (18.4)  | 29 (15.5)  | 41 (43.2) |
| <i>Marital status</i>              |             |              |            |             |            |           |
| Single                             | 508 (15.7)  | 29 (1.7)     | 150 (21.8) | 223(37.0)   | 90 (48.1)  | 16 (16.8) |
| Married                            | 2632 (81.2) | 1632 (97.8)  | 505 (73.3) | 339(56.2)   | 83 (44.40) | 73 (76.8) |
| Divorced/widow                     | 102 (3.1)   | 7 (0.4)      | 34 (4.9)   | 41 (6.8)    | 14(7.49)   | 6 (6.3)   |
| <i>Place of residence (%)</i>      |             |              |            |             |            |           |
| Barisal Division                   | 172 (5.31)  | 70 (4.20)    | 48 (7.0)   | 35 (5.0)    | 7 (3.7)    | 12 (12.6) |
| Chittagong Division                | 291 (9.0)   | 100 (6)      | 107 (15.5) | 61 (10.1)   | 16(8.6)    | 7(7.4)    |
| Dhaka Division                     | 1574 (48.6) | 1010 (60.6)  | 205 (29.8) | 236 (39.1)  | 95 (50.8)  | 28 (29.5) |
| Khulna Division                    | 352 (10.9)  | 115 (6.9)    | 109 (15.8) | 92 (15.3)   | 20 (10.7)  | 16 (16.8) |
| Mymensingh Division                | 313 (9.7)   | 127 (7.6)    | 76 (11.0)  | 85 (14.1)   | 17 (9.1)   | 8 (8.4)   |
| Rajshahi Division                  | 213 (6.6)   | 99 (5.9)     | 47 (6.8)   | 41 (6.8)    | 18 (9.6)   | 8 (8.4)   |
| Rangpur Division                   | 179 (5.5)   | 93 (5.6)     | 45 (6.5)   | 22 (3.7)    | 9 (4.8)    | 10 (10.5) |
| Sylhet Division                    | 148 (4.6)   | 54 (3.2)     | 52 (7.6)   | 31 (5.1)    | 5 (2.7)    | 6 (6.3)   |
| <i>Mother's Level of Education</i> |             |              |            |             |            |           |
| Higher education (above Bachelor   | 1287 (39.7) | 684 (41.0)   | 341 (49.5) | 178 (29.5)  | 46 (24.6)  | 38 (40.)  |
| Intermediate (11–12)               | 441 (13.6)  | 23 (1.4)     | 122 (17.7) | 192 (31.84) | 74 (39.5)  | 30 (31.6) |
| <i>Working status</i>              |             |              |            |             |            |           |
| Employed                           | 2864 (88.3) | 1647 (98.7)  | 600 (87.1) | 432 (71.6)  | 99 (52.9)  | 86 (91.0) |
| Not employed/student               | 378 (11.7)  | 21 (1.3)     | 89 (12.9)  | 171 (28.4)  | 88 (47.1)  | 9 (9.47)  |
| <i>Income in Taka</i>              |             |              |            |             |            |           |
| lower-income (<30,000)             | 204 (6.3)   | 14 (0.9)     | 37 (5.4)   | 102 (16.9)  | 41 (21.9)  | 10 (10.4) |
| middle-income (30,000-70,000)      | 1496 (46.1) | 510 (30.9)   | 433 (62.8) | 389 (64.5)  | 108 (57.8) | 56 (59.0) |
| High-income (>70,000)              | 1542 (47.7) | 1144 (68.59) | 219 (31.8) | 112 (18.8)  | 38 (20.3)  | 29 (30.5) |
| <i>Occupation</i>                  |             |              |            |             |            |           |
| Healthcare workers                 | 675 (20.8)  | 31 (1.9)     | 212 (30.8) | 304 (50.4)  | 89 (47.6)  | 39 (41.1) |
| Non-health care worker             | 2567 (79.2) | 1637 (98.1)  | 477 (69.2) | 299 (49.6)  | 98 (52.4)  | 56 (59.0) |

217

218 **Prevalence and 95% confidence intervals of physical complaints by gender among**  
 219 **internet users.**

220

221 *Table 2* depicts the prevalence and 95% CIs of the adverse effects on individual physical

222 health complaints examined in this study in males and females. Headache 72.50% [95%CI

223 70.93%, 74.01%] was the prevalent complaint of the participants, while 69.87% [68.27%,

224 71.43%] and 65.10% [63.42%, 66.71%] complained of Back pain and numbness of the

225 fingers, respectively. Males reported a higher prevalence of back pain, numbness of the  
226 finger, headaches, and neck pains than females as the confidence intervals do not overlap (see  
227 **Table 2**). By contrast, females reported a higher prevalence of poor nutrition, poor personal  
228 hygiene, and loss of appetite compared with men (**Table 2**).

229 **Table 2** Gender differences in the prevalence of physical health scores among internet users  
230 in Bangladesh. *Significant variables between males and females are bolded because the*  
231 *confidence intervals did not overlap.*

| Physical complaints            | n    | Prevalence (95%CI)   |                             |                             |
|--------------------------------|------|----------------------|-----------------------------|-----------------------------|
|                                |      | Overall              | Male                        | Female                      |
| Back pain                      | 2261 | 69.9 [68.27, 71.43]  | <b>78.14 [76.26, 79.91]</b> | 56.90 [54.15, 59.62]        |
| Finger numbness                | 2106 | 65.10 [63.42, 66.71] | <b>72.37 [70.35, 74.30]</b> | 53.65 [50.89, 56.39]        |
| Headaches                      | 2346 | 72.50 [70.93, 74.01] | <b>78.80 [76.94, 80.54]</b> | 62.62 [59.91, 65.25]        |
| Inability to sleep             | 1396 | 43.14 [41.44, 44.85] | 41.95 [39.79, 44.14]        | 45.00 [42.27, 47.76]        |
| Poor Nutrition                 | 746  | 23.05 [21.63, 24.54] | 16.55 [14.97, 18.25]        | <b>33.25 [30.70, 35.91]</b> |
| Poor Personal Hygiene          | 605  | 18.70 [17.39, 20.08] | 14.98 [13.47, 16.62]        | <b>24.52 [22.23, 26.98]</b> |
| Neck pain                      | 1789 | 55.28 [53.56, 56.99] | <b>58.50 [56.31, 60.66]</b> | 50.24 [47.48, 53.00]        |
| Dry eyes/other vision problems | 1815 | 56.09 [54.37, 57.79] | 57.54 [55.35, 59.70]        | 53.81 [51.05, 56.55]        |
| Weight gain/loss               | 1653 | 51.08 [49.36, 52.80] | 52.43 [50.22, 54.63]        | 48.97 [46.21, 51.73]        |
| Loss of Appetite               | 499  | 15.42 [14.22, 16.71] | 13.77 [12.31, 15.36]        | <b>18.02 [15.99, 20.24]</b> |

232 *CI=Confidence interval; n= number of respondents*

233 **Figure 1** shows the mean scores of physical health by internet use frequency in males  
234 and females. From the figure, the mean scores of physical health by intensive internet use  
235 was 5.6 for males and 5.4 for females. This physical health mean scores could be translated  
236 as percentage mean scores of males (56%) and females (54%), respectively. Physical health  
237 mean scores were lower among the casual user of internet (3.2 for females and 3.0 for males)  
238 than seldom users of internet (3.1 for females and 3.4 for males)

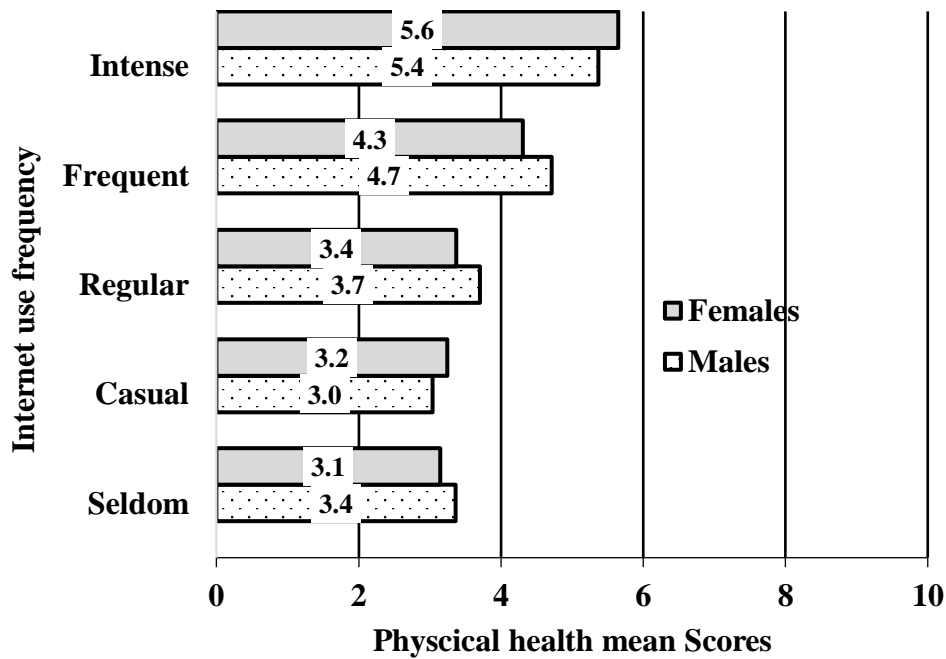

239  
240  
241  
242  
243

**Figure 1.**

Mean scores by gender of the physical health by internet use frequency in Bangladesh

**Unadjusted Analysis for the association between prolonged internet use and physical health complaints**

Table 3 shows the mean scores of physical health complaints and the unadjusted coefficients for the associations with the sociodemographic variables. From the table, the mean scores for physical health complaints varied across variables. The unadjusted coefficients revealed significantly higher physical health problems due to prolonged internet use in those aged >28years, married, completed bachelor education, middle-high income earners and non-healthcare workers compared with other groups. In contrast, females, those who were divorced or widowed, those with intermediate education, non-workers/students and respondents who resided in Chittagong, Dhaka and Khulna during the study period had significantly lower mean scores of physical health complaints from prolonged internet usage compared with the other groups.

256  
257  
258

**Table 3: Mean scores and** Univariate linear regression of Physical Complaints among Internet Users.

| <b>Variables</b>                   | <b>Mean scores (SD)</b> | <b>Unadjusted Coefficient [95%CI]</b> |
|------------------------------------|-------------------------|---------------------------------------|
| <b>Gender</b>                      |                         |                                       |
| Male                               | 4.85 (1.83)***          | Reference                             |
| Female                             | 4.47 (1.88)             | <b>-0.38 [-0.51, -0.25]</b>           |
| <b>Age,</b>                        |                         |                                       |
| 18-27 yrs                          | 3.52 (1.71)***          | Reference                             |
| 28-37 yrs                          | 5.02 (1.81)             | <b>1.50 [1.33, 1.67]</b>              |
| 38+ yrs                            | 4.80 (1.77)             | <b>1.31 [1.12, 1.49]</b>              |
| <b>Marital status</b>              |                         |                                       |
| Single                             | 3.67 (1.76)***          | Reference                             |
| married                            | 4.96 (1.79)             | <b>1.30 [1.13, 1.47]</b>              |
| Divorced/widow                     | 3.00 (1.19)             | <b>-0.67 [-1.04, -0.29]</b>           |
| <b>Place of residence</b>          |                         |                                       |
| Barisal Division                   | 5.35 (1.83)***          | Reference                             |
| Chittagong Division                | 4.66 (1.87)             | <b>-0.69 [-1.04, -0.35]</b>           |
| Dhaka Division                     | 4.36 (1.77)             | <b>-0.99 [-1.28, -0.70]</b>           |
| Khulna Division                    | 4.83 (1.83)             | <b>-0.52 [-0.85, -0.19]</b>           |
| Mymensingh Division                | 5.03 (1.92)             | -0.32 [-0.66, 0.02]                   |
| Rajshahi Division                  | 5.21 (1.91)             | -0.14 [-0.51, 0.22]                   |
| Rangpur Division                   | 5.47 (1.88)             | 0.12 [-0.26, 0.50]                    |
| Sylhet Division                    | 4.99 (1.83)             | -0.36 [-0.76, 0.04]                   |
| <b>Mother's Level of Education</b> |                         |                                       |
| Higher education                   | 4.71 (1.82)***          | Reference                             |
| Bachelor                           | 5.00 (1.87)             | <b>0.30 [0.16, 0.43]</b>              |
| Intermediate (11–12)               | 3.65 (1.50)             | <b>-1.06 [-1.26, -0.86]</b>           |
| <b>Working status</b>              |                         |                                       |
| Employed                           | 4.89 (1.79)***          | Reference                             |
| Not employed/student               | 3.24 (1.72)             | <b>-1.65 [-1.84, -1.46]</b>           |
| <b>Income in Taka</b>              |                         |                                       |
| lower-income (<30,000)             | 3.05 (1.50)***          | Reference                             |
| middle-income (30,000)             | 4.82 (1.88)             | <b>1.77 [1.51, 2.04]</b>              |
| High-income (>70,000)              | 4.80 (1.77)             | <b>1.75 [1.48, 2.01]</b>              |
| <b>Occupation</b>                  |                         |                                       |
| Healthcare workers                 | 3.62 (1.26)***          | Reference                             |
| Non-health care workers            | 4.98 (1.89)             | <b>1.36 [1.21, 1.51]</b>              |

259 <sup>SD=standard deviation; CI=confidence interval. \*\*\*= $P < .001$  based on t-test and Anova. Bolded are significant coefficients.</sup>

260

261 **The impact of the frequency of internet use on physical health scores**

262 *Figure 2* presents the unadjusted and adjusted odds ratio and their confidence intervals for  
 263 the association between frequency of internet use and physical health symptoms during the  
 264 COVID-19. In the unadjusted analysis, frequent and intensive internet users during the  
 265 COVID-19 significantly reported higher physical health problems than seldom users of the  
 266 internet. After adjusting for the independent variables used in this study, regular, frequent,  
 267 and intensive internet users during the COVID-19 had significantly higher physical health  
 268 problems than those who seldom used the internet (see *Figure 2*).

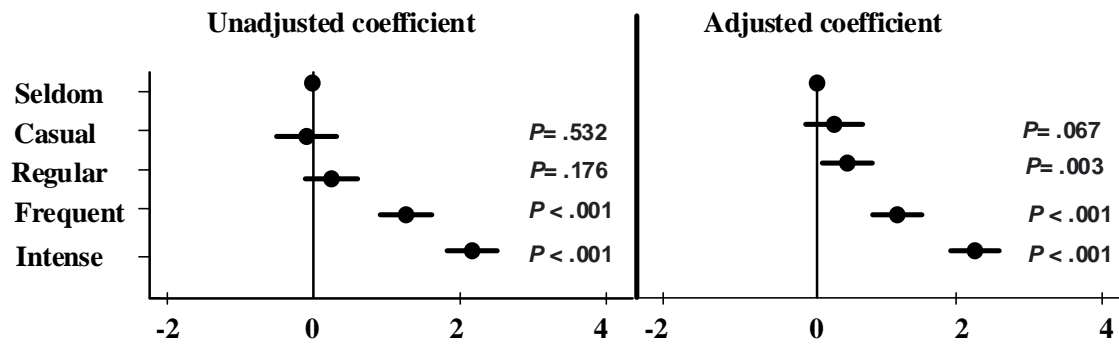

269

270 *Independent variables adjusted for are Gender, Age group, Division of residence, Mothers Education, marital status, income, working status, occupation.*

271 **Figure 2:** The impact of frequency of internet use on physical health scores: Unadjusted and  
 272 adjusted coefficient and their 95% confidence intervals.

273

274 Marital status, age, gender, place of residence, level of education, working status,  
 275 occupation, and income level were all associated with the physical health complaints among  
 276 internet users in Bangladesh (*Supplementary Table S1 for details*).

277

278 **DISCUSSION**

279 A considerable body of literature has emerged over the past two decades assessing the  
 280 relationship between problematic or addictive (excessive) use of the internet and individuals'  
 281 psychological/mental well-being. Comparatively, very little research has evaluated the  
 282 relationship between various internet use frequencies and the individual's physical health.  
 283 The COVID-19 pandemic caused a drastic surge in the use of the internet globally and  
 284 Bangladesh <sup>[1]</sup>, and this cross-sectional study investigated the relationship between the  
 285 frequency of internet use and the physical health of Bangladeshi respondents. The findings  
 286 demonstrated that more than one in every two persons in this study used the internet for seven  
 287 or more hours each day. This was associated with 2.2 folds increase in physical health  
 288 problems compared with seldom users (<1 hour per day). Headache, back pain and numbness  
 289 of the fingers (reported by over seventy percent of internet users) were the predominant  
 290 complaints. There was a positive association between physical health problems and the  
 291 number of daily hours spent on the internet. After adjusting for the frequency of internet use,

292 we found that middle to high-income earners and those working in non-healthcare sectors  
293 experienced more significant physical health problems due to internet use. In comparison,  
294 students and widowed or divorced persons reported fewer physical health problems compared  
295 with other respondents.

296 This study found that headache was the most prevalent symptom reported by internet  
297 users in Bangladesh, followed by back pain and numbness of the fingers. These complaints  
298 were significantly increased among frequent internet users and intense users, which agrees  
299 with the findings of significant association between extensive use of the internet and physical  
300 health problems in previous studies <sup>[19-22]</sup>. A study in Spain reported that headache was the  
301 most common complaint among internet users during the COVID-19 pandemic <sup>[22]</sup>. Similarly,  
302 Cao et al.s study (2009), after examining adolescents, found that those who used the internet  
303 excessively were more likely to report psychosomatic symptoms including lack of physical  
304 energy, physiological dysfunction, weakened immunity, emotional symptoms, behavioural  
305 symptoms and social adaptation problems and had lower life satisfaction scores compared  
306 with normal internet users <sup>[20]</sup>.

307 There are also reports that school children and other graduate students in China <sup>[23]</sup>  
308 and Italy <sup>[24]</sup> experienced increased psychological distress following excessive internet use  
309 during the COVID-19 pandemic. Such addiction to the internet can result in the problem of  
310 self-care, difficulty in performing daily routine, and mental health effects of anxiety and  
311 depression <sup>[25]</sup>. The negative effects of internet addiction on health may be related to the  
312 alterations in the individuals neuroanatomical and neurochemical mechanisms, including  
313 cortical thinning of various components of the brain and dopaminergic reward circuitry,  
314 during excessive use of the internet <sup>[25]</sup>. While it is imperative that such behaviours,  
315 especially during a pandemic, remain at a moderate and regulated level, identifying the  
316 population at risk of the problematic use of the internet is necessary in order to prevent the  
317 associated mental health problems <sup>[26]</sup> and improve work or school functions <sup>[27]</sup>.

318           The present study further revealed that, compared with women, a higher proportion of  
319 men used the internet excessively during the pandemic and thus experienced more significant  
320 physical health problems. However, this association was significant only when it interacted  
321 with the frequency of internet use. Previous studies among Taiwanese residents <sup>[28]</sup> and those  
322 in mainland China <sup>[29]</sup> found that male gender was a potential risk factor for internet addiction  
323 among adolescents. This association of gender and physical health complaints found in the  
324 present study could be explained by the patriarchal nature of the Bangladesh society, where  
325 women and girls rarely go outside of their homes even before the pandemic <sup>[30]</sup> but preferred  
326 to stay home and spend more time on the Internet. Whereas these women may have  
327 developed adaptive strategies, it was a different experience for the male counterpart, which  
328 were used to staying outside/working prior to the lockdown. For these men, the lockdown  
329 measures and transition to work online and/or staying at home required them to adjust  
330 quickly, try, experiment, and find ways that did not exist before the pandemic <sup>[1]</sup> as  
331 educational institutions, businesses and workplaces were shut down for such a long duration  
332 <sup>[31]</sup>. These adjustments may have affected their physical health.

333           Another finding of this study was the significant relationship between income class  
334 and occupational status (non-healthcare worker) with the physical health problems  
335 experienced by internet users. Earning above 30,000 Taka was associated with higher  
336 physical health problems due to internet usage after adjusting for the frequency of internet  
337 use. In line with this finding, Islam et al <sup>[32]</sup> on the correlation between problematic  
338 (excessive) internet use (PIU) and lifestyle during the COVID-19 pandemic using data from a  
339 large sample of Bangladeshi youth and adults (n=13,525) found that younger age, higher  
340 education, cigarette smoking, more sleep, less physical activity, gaming and social media use  
341 were associated with PIU <sup>[32]</sup>. This research has depicted the physical health concerns related  
342 to prolonged internet usage during the COVID-19 pandemic. A similar association was found  
343 in this research between educational status, age and physical health complaints among

344 internet users in Bangladesh; however, these associations were dependent on the frequency of  
345 internet use, which was not assessed in the previous study [32].

346 The finding that non-healthcare workers had higher physical health problems  
347 compared with health care workers in this study is consistent with the finding of poorer  
348 psychological well-being among non-health-care workers who used the Internet to obtain  
349 information on COVID-19 compared with those who received COVID-19 information from  
350 medical staff in health care settings [33]. Although this research were unable to identify  
351 whether the non-healthcare workers in our study used the internet for COVID-19 information  
352 retrieval, it has been shown that the influx of misinformation around COVID-19 via online  
353 platforms had adverse effects on people's health [33]. Such problematic internet use (PIU) can  
354 lead to clinical impairment, distress [34] and/or deterioration in financial, familial, social,  
355 educational and/or occupational domains [35].

356 This study has some limitations. First, the cross-sectional design of this study does not  
357 allow for causality or the direction of relationships to be determined. However, appropriate  
358 analysis of cross-sectional data represents a useful initial step in identifying associations  
359 between extensive internet usage and the physical health condition of the participants.  
360 Second, as the responses were self-reported, it was not possible to verify the participants'  
361 physical health complaints, which may lead to a response bias. Multiple assessments,  
362 interviews, and informants may have provided a richer and more thorough understanding of  
363 this topic. Third, since the survey was administered during COVID-19 lockdown using an  
364 online platform, it is possible that some respondents, especially those living in rural areas  
365 with limited internet access or people addicted to other online platforms such as gaming or  
366 social media, may not have participated in this survey. Although this findings may not  
367 represent the opinion of all internet users, a face-to-face survey was not possible at the time  
368 due to the lockdown measures. Despite these limitations, this was the first study to investigate  
369 the associations between extensive internet use and physical health symptoms in a sample of



370 adolescents in mainland Bangladesh. Future studies could address nesting follow-ups in  
371 existing random samples that could provide timely access to longitudinal population-  
372 representative data.

373

### 374 **Conclusions**

375 In summary, the study demonstrated that uncontrolled use of the internet is prevalent among  
376 the respondents in this study as more than two-third reported excessive use of the internet  
377 during the lockdown, and this doubled the adverse effects on their physical health compared  
378 with seldom users. Headaches, back pain, numbness of the fingers and neck pain were  
379 predominant among internet users as spending 3 hours or more each day on the internet led to  
380 a significant increase in the level of adverse physical health problems. The positive  
381 associations between physical complaints and non-healthcare workers, middle to high-income  
382 earners, indicate the target group for interventions to minimize this growing epidemic. The  
383 health department of the Bangladesh government has now recognized extensive internet  
384 usage as a serious public health problem. Arguably, it is time for the World Health  
385 Organization and health departments worldwide to develop effective health policies to  
386 increase public awareness of extensive internet use, especially during the pandemic. This has  
387 the potential to affect millions of children and adults and, eventually the societies and  
388 economies.

389

390

391 **References**

- 392 1. De' R, Pandey N, Pal A. Impact of digital surge during Covid-19 pandemic: A  
393 viewpoint on research and practice. *Int J Inf Manage.* 2020;55(102171):102171.  
394 2. Garfin DR. *Technology as a Coping Tool during the COVID-19 Pandemic:*  
395 *Implications and Recommendations.* Stress and Health; 2020.  
396 3. Kawohl W, Nordt C. COVID-19, unemployment, and suicide. *Lancet Psychiatry.*  
397 2020;7(5):389-390.  
398 4. Király O, Potenza MN, Stein DJ, King DL, Hodgins DC, Saunders JB, Griffiths MD,  
399 Gjoneska B, Billieux J, Brand M, Abbott MW, Chamberlain SR, Corazza O,  
400 Burkauskas J, Sales CMD, Montag C, Lochner C, Grünblatt E, Wegmann E,  
401 Martinotti G, Lee HK, Rumpf H-J, Castro-Calvo J, Rahimi-Movaghar A, Higuchi S,  
402 Menchon JM, Zohar J, Pellegrini L, Walitza S, Fineberg NA, Demetrovics Z.  
403 Preventing problematic internet use during the COVID-19 pandemic: Consensus  
404 guidance. *Compr Psychiatry.* 2020;100(152180):152180.  
405 5. Ito M, Horst HA, Bittanti M, Herr Stephenson B, Lange PG, Pascoe CJ, Robinson L.  
406 Living and learning with new media. In: The MIT Press; 2009:128.  
407 6. O'Keeffe GS, Clarke-Pearson K, Council on Communications and Media. The impact  
408 of social media on children, adolescents, and families. *Pediatrics.* 2011;127(4):800-  
409 804.  
410 7. Hinduja S, Patchin JW. Offline consequences of online victimization: School violence  
411 and delinquency. *Journal of school violence.* 2007;6(3):89–112.  
412 8. Internet. Gov.bd. Accessed August 6, 2021. <http://www.btrc.gov.bd/telco/internet>  
413 9. Ayyagari, Grover, Purvis. Technostress: Technological Antecedents and  
414 Implications. *MIS Q.* 2011;35(4):831.  
415 10. Tarafdar M, Tu Q, Ragu-Nathan BS, Ragu-Nathan TS. The impact of technostress on  
416 role stress and productivity. *J Manag Inf Syst.* 2007;24(1):301-328.  
417 11. Kalia A. *The Zoom Boom: How Video Calling Became a Blessing—and a Curse.* The  
418 Guardian; 2020.  
419 12. Osuagwu UL, Miner CA, Bhattarai D, Mashige KP, Oloruntoba R, Abu EK,  
420 Ekpenyong B, Chikasirimobi TG, Goson PC, Oveneri-Ogbomo GO, Langsi R,  
421 Charwe DD, Ishaya T, Nwaeze O, Agho KE. Misinformation about COVID-19 in  
422 sub-Saharan Africa: Evidence from a cross-sectional survey. *Health Secur.*  
423 2021;19(1):44-56.  
424 13. Lee JJ, Kang K-A, Wang MP, Zhao SZ, Wong JYH, O'Connor S, Yang SC, Shin S.  
425 Associations between COVID-19 misinformation exposure and belief with COVID-  
426 19 knowledge and preventive behaviors: Cross-sectional online study. *J Med Internet*  
427 *Res.* 2020;22(11):e22205.  
428 14. Zheng Y, Wei D, Li J, Zhu T, Ning H. Internet use and its impact on individual  
429 physical health. *IEEE Access.* 2016;4:5135-5142.  
430 15. Usgaonkar U, Shet Parkar SR, Shetty A. Impact of the use of digital devices on eyes  
431 during the lockdown period of COVID-19 pandemic. *Indian J Ophthalmol.*  
432 2021;69(7):1901-1906.  
433 16. Lam LT, Peng ZW, Mai JC, Jing J. Faktorer forbundet med internettavhengighet blant  
434 ungdom. *Cyberpsychol Behav.* 2009;12:551–555.

- 435 17. Heinze G, Dunkler D. Five myths about variable selection. *Transpl Int*. 2017;30(1):6-  
436 10.
- 437 18. Vatcheva KP, Lee M, McCormick JB, Rahbar MH. Multicollinearity in regression  
438 analyses conducted in epidemiologic studies. *Epidemiology (Sunnyvale)*. 2016;6(2).  
439 doi:10.4172/2161-1165.1000227
- 440 19. Morrison CM, Gore H. The relationship between excessive Internet use and  
441 depression: a questionnaire-based study of 1,319 young people and  
442 adults. *Psychopathology*. 2010;43(2):121-126.
- 443 20. Cao H, Sun Y, Wan Y, Hao J, Tao F. Problematic Internet use in Chinese adolescents  
444 and its relation to psychosomatic symptoms and life satisfaction. *BMC Public Health*.  
445 2011;11:802.
- 446 21. Tsai HF, Cheng SH, Yeh TL, Shih CC, Chen KC, Yang YC, Yang YK. The risk  
447 factors of Internet addiction—a survey of university freshmen. *Psychiatry research*.  
448 2009;167(3):294–299.
- 449 22. López-Bravo A, García-Azorín D, Belvís R, González-Oria C, Latorre G, Santos-  
450 Lasaosa S, Guerrero-Peral AL. Impact of the COVID-19 pandemic on headache  
451 management in Spain: an analysis of the current situation and future  
452 perspectives. *Neurol (Engl Ed)*. 2020;35(6):372-380.
- 453 23. Chen C-Y, Chen I-H, Pakpour AH, Lin C-Y, Griffiths MD. Internet-related behaviors  
454 and psychological distress among schoolchildren during the COVID-19 school  
455 hiatus. *Cyberpsychol Behav Soc Netw*. 2021;(cyber.2020.0497).  
456 doi:10.1089/cyber.2020.0497
- 457 24. Servidio R, Bartolo MG, Palermi AL, Costabile A. Fear of COVID-19, depression,  
458 anxiety, and their association with Internet addiction disorder in a sample of Italian  
459 students. *Journal of Affective Disorders Reports*. 2021;4(100097):100097.
- 460 25. Tripathi A. Impact of internet addiction on mental health: An integrative therapy is  
461 needed. *Integr Med Int*. 2018;4(3-4):215-222.
- 462 26. Wieckiewicz M, Danel D, Pondel M, Smardz J, Martynowicz H, Wieczorek T, Mazur  
463 G, Pudlo R, Wieckiewicz G. Identification of risk groups for mental disorders,  
464 headache and oral behaviors in adults during the COVID-19 pandemic. *Sci Rep*.  
465 2021;11(1):10964.
- 466 27. Kelley KJ, Gruber EM. Psychometric properties of the Problematic Internet Use  
467 Questionnaire. *Comput Human Behav*. 2010;26(6):1838-1845.
- 468 28. Yen C-F, Ko C-H, Yen J-Y, Chang Y-P, Cheng C-P. Multi-dimensional  
469 discriminative factors for Internet addiction among adolescents regarding gender and  
470 age: Internet addiction in adolescence. *Psychiatry Clin Neurosci*. 2009;63(3):357-364.
- 471 29. Lam LT, Peng Z-W, Mai J-C, Jing J. Factors associated with Internet addiction  
472 among adolescents. *Cyberpsychol Behav*. 2009;12(5):551-555.
- 473 30. Lata LN, Walters P, Roitman S. The politics of gendered space: Social norms and  
474 purdah affecting female informal work in Dhaka, Bangladesh. *Gend Work Organ*.  
475 2021;28(1):318-336.
- 476 31. Husain T, Uddin MM, Chowdhury SA, Kalimullah NA. Mental Health Status of  
477 Adolescents During the COVID-19 pandemic: A cross-sectional survey among the  
478 Bangladeshi graduate students at Dhaka city. *bioRxiv*. Published online 2020.  
479 doi:10.1101/2020.11.12.379487

- 480 32. Islam MS, Sujan MSH, Tasnim R, Ferdous MZ, Masud JHB, Kundu S, Mosaddek  
481 ASM, Choudhuri MSK, Kircaburun K, Griffiths MD. Problematic internet use among  
482 young and adult population in Bangladesh: Correlates with lifestyle and online  
483 activities during the COVID-19 pandemic. *Addict Behav Rep.*  
484 2020;12(100311):100311.
- 485 33. Ko N-Y, Lu W-H, Chen Y-L, Li D-J, Wang P-W, Hsu S-T, Chen C-C, Lin Y-H,  
486 Chang Y-P, Yen C-F. COVID-19-related information sources and psychological well-  
487 being: An online survey study in Taiwan. *Brain Behav Immun.* 2020;87:153-154.
- 488 34. Shaw M, Black DW. Internet addiction: Definition, assessment, epidemiology  
489 and??Clinical management. *CNS Drugs.* 2008;22(5):353-365.
- 490 35. ICD-11 for mortality and morbidity statistics. Who.int. Accessed August 6, 2021.  
491 <https://icd.who.int/browse11/l-m/en>

492

493

494

495

496 **Supplementary Table 1** Results of Multiple Regression Analysis in Prediction of Level of  
497 Physical Complaints Among Internet Users. *Bold are significant variables.*

| Variables                          | Adjusted Coefficients [95%CI] | P-value |
|------------------------------------|-------------------------------|---------|
| <b>Gender</b>                      |                               |         |
| Male                               | Reference                     |         |
| Female                             | -0.08 [-0.20, 0.04]           | 0.179   |
| <b>Age groups</b>                  |                               |         |
| 18-27 yrs                          | Reference                     |         |
| 28-37 yrs                          | 0.09 [-0.13, 0.30]            | 0.440   |
| 38+ yrs                            | -0.03 [-0.29, 0.23]           | 0.818   |
| <b>Marital status</b>              |                               |         |
| Single                             | Reference                     |         |
| married                            | -0.08[-0.29, 0.12]            | 0.431   |
| Divorced/widow                     | <b>-1.09[-1.44, -0.74]</b>    | <0.0005 |
| <b>Place of residence</b>          |                               |         |
| Barisal Division                   | Reference                     |         |
| Chittagong Division                | <b>-0.70 [-0.99, -0.41]</b>   | <0.0005 |
| Dhaka Division                     | <b>-1.27 [-1.51, -1.02]</b>   | <0.0005 |
| Khulna Division                    | <b>-0.42 [-0.70, -0.14]</b>   | 0.003   |
| Mymensingh Division                | <b>-0.31 [-0.59, -0.03]</b>   | 0.031   |
| Rajshahi Division                  | -0.29 [-0.60, 0.01]           | 0.060   |
| Rangpur Division                   | -0.11[-0.43, 0.21]            | 0.487   |
| Sylhet Division                    | <b>-0.40[-0.74, -0.07]</b>    | 0.018   |
| <b>Mother's Level of Education</b> |                               |         |
| Higher education                   | Reference                     |         |
| Bachelor                           | -0.00 [-0.16, 0.16]           | 0.976   |
| Intermediate (11–12)               | 0.01 [-0.19, 0.21]            | 0.924   |
| <b>Working status</b>              |                               |         |
| Employed                           | Reference                     |         |
| Not employed/student               | <b>-0.49 [-0.72, -0.26]</b>   | <0.0005 |
| <b>Income in Taka</b>              |                               |         |
| lower-income (<30,000)             | Reference                     |         |
| middle-income (30,000-70,000)      | <b>0.72 [0.48, 0.96]</b>      | <0.0005 |
| High-income (>70,000)              | 0.26 [-0.00, 0.53]            | 0.052   |
| <b>Occupation</b>                  |                               |         |
| Healthcare workers                 | Reference                     |         |
| Non-health care worker             | <b>0.62 [0.47, 0.78]</b>      | <0.0005 |
| <b>Internet use Frequency</b>      |                               |         |
| Seldom                             | Reference                     | -       |
| Casual                             | 0.36 [-0.02, 0.74]            | 0.067   |
| Regular                            | <b>0.52 [0.18, 0.85]</b>      | 0.003   |
| Frequent                           | <b>1.21 [0.88, 1.54]</b>      | <0.0005 |
| Intense                            | <b>2.24 [1.91, 2.57]</b>      | <0.0005 |
| <b>Constant</b>                    | 3.18 [2.69, 3.67]             | <0.0005 |

498 <sup>†</sup>The final model included Gender, Age group, Division, Mother's education, Income status, Employment status, Occupational status, Marital  
499 status and Internet use frequency.
